# Supplementary material for: Assessment of new HDAC inhibitors for immunotherapy of malignant pleural mesothelioma
Source: PubMed Central journal article supplement (PMC6006850; doi:10.1186/s13148-018-0517-9), 2018-06-18

Fig. S2

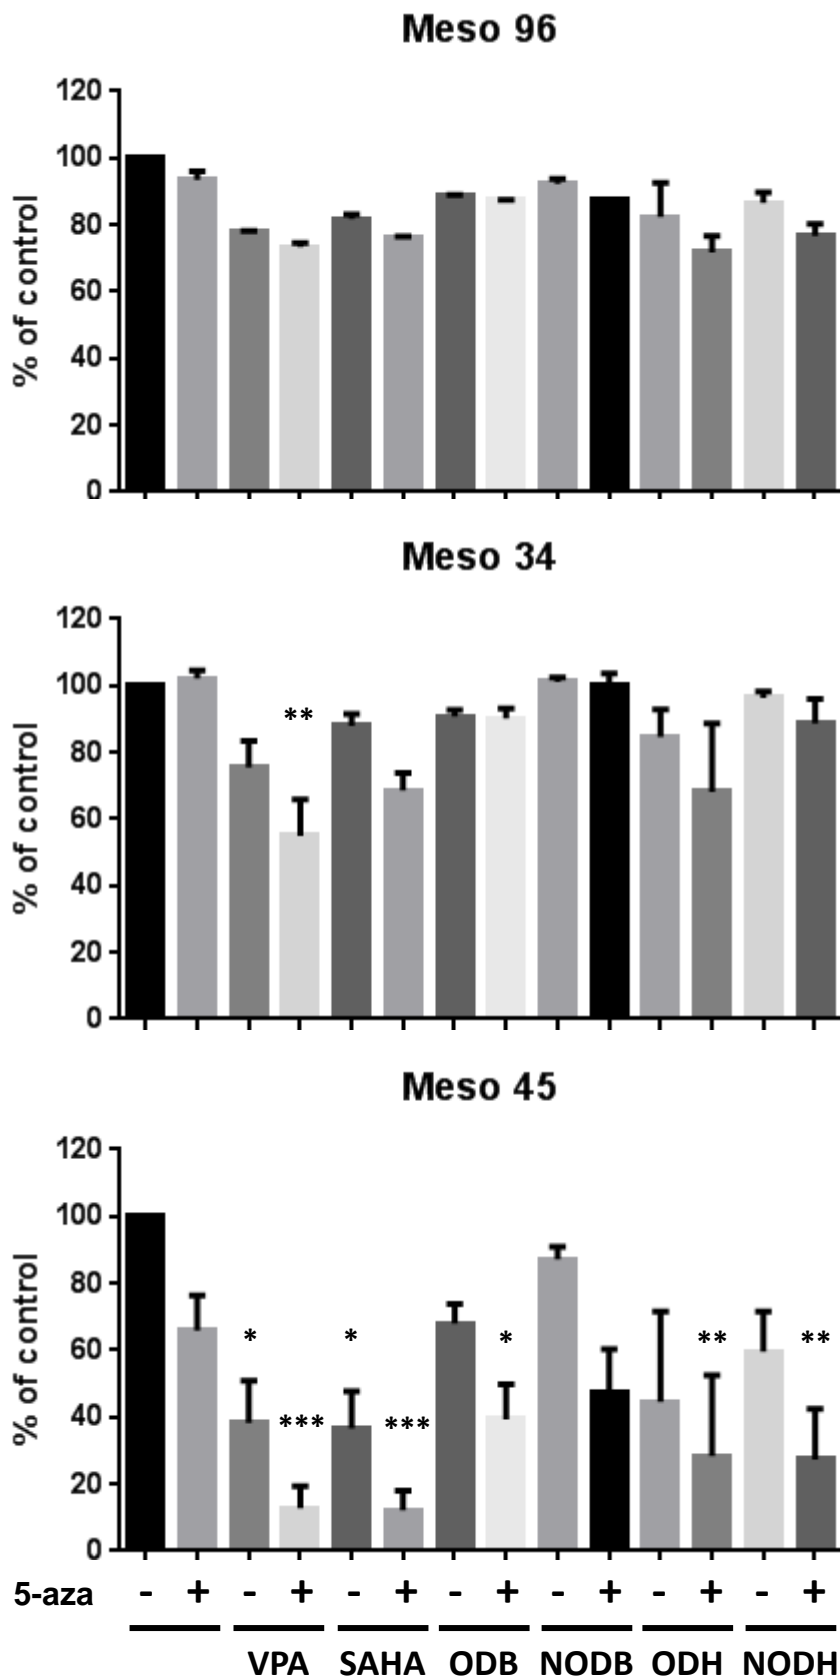

Supplement: 13148_2018_517_MOESM5_ESM.pdf [file 13148_2018_517_MOESM5_ESM.pdf]
